# Supplementary material for: CD44 Assists the Topical Anti-Psoriatic Efficacy of Curcumin-Loaded Hyaluronan-Modified Ethosomes: A New Strategy for Clustering Drug in Inflammatory Skin
Source: PubMed Central journal article supplement — Theranostics. 2019 Jan 1;9(1):48–64. doi: 10.7150/thno.29715 (PMC6332788; doi:10.7150/thno.29715), 2019-01-01

**CD44 assists topical anti-psoriatic efficacy of curcumin-loaded hyaluronan-modified ethosomes: a new strategy for clustering drug in inflammatory skin**

Yongtai Zhang<sup>1</sup>, Qing Xia<sup>1</sup>, Yanyan Li<sup>1</sup>, Zehui He<sup>1</sup>, Zhe Li, Teng Guo, Zhonghua Wu, Nianping Feng \*

*Department of Pharmaceutical Sciences, Shanghai University of Traditional Chinese Medicine, Shanghai 201203, China*

\* Corresponding author

E-mail addresses: npfeng@hotmail.com; npfeng@shutcm.edu.cn

<sup>1</sup> Authors contributed equally to this work

## Supplementary Figure Legends

Fig. S1 FT-IR spectra of hyaluronic acid (HA), dioleoyl phosphoethanolamine (DOPE), and HA- conjugated DOPE (HA-DOPE).

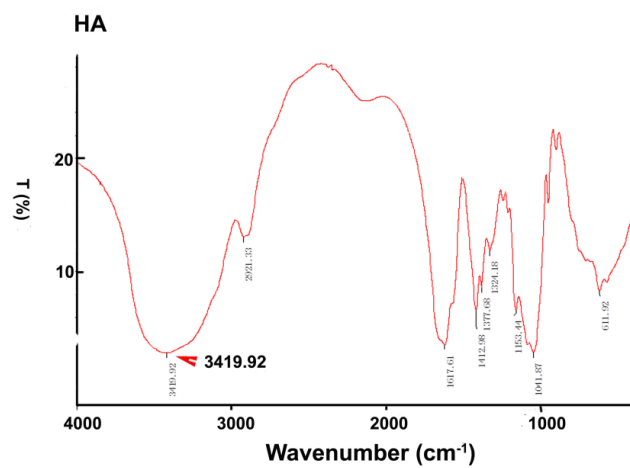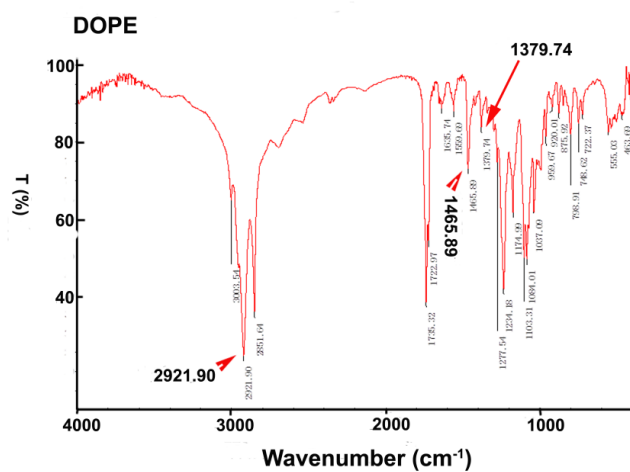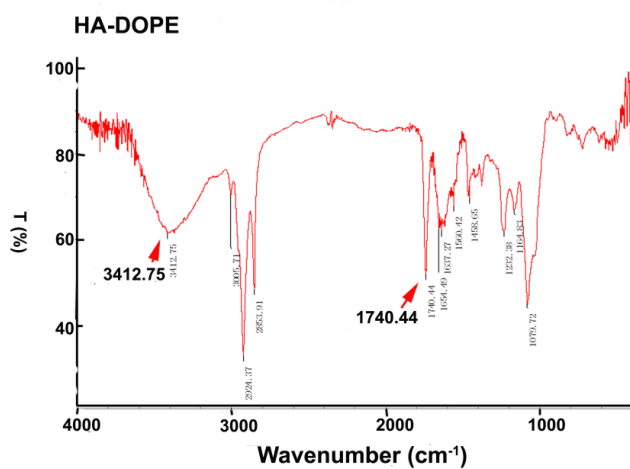

Fig. S2 Increase in mouse ear thickness after treatment with the various formulations (n = 6). Compared with model control, \*\*p < 0.01, \*\*\*p < 0.001; HA-ES and ES compared with PGS,  $\Delta\Delta\Delta p < 0.001$ ; HA-ES compared with ES,  $\phi p < 0.05$ . Normal, mice treated without any formulations; Model, treated with IMQ only; HA, hyaluronic acid; HA-ES, curcumin-loaded HA-modified ethosomes; HA-ES-empty, HA-ES without curcumin; ES, curcumin-loaded ethosomes; PGS, curcumin 25% propylene glycol solution; IMQ, imiquimod ointment; CP, clobetasol propionate cream.

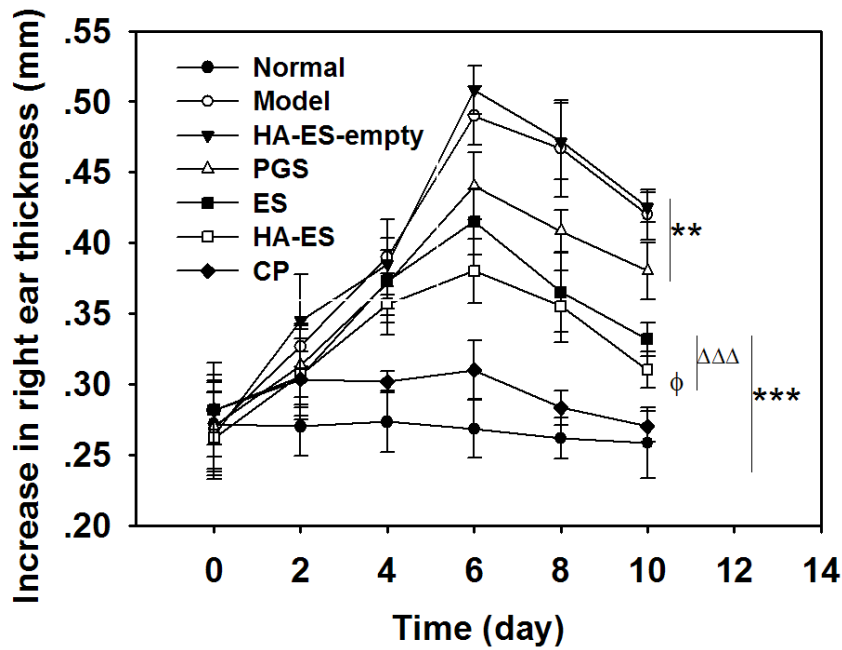

Supplement: thnov09p0048s1.pdf [file thnov09p0048s1.pdf]
